1 **Andes virus genome mutations that are likely associated with animal-model attenuation**  
2 **and human person-to-person transmission**

3 Carla M. Bellomo<sup>1,\*,#</sup>, Daniel O. Alonso<sup>1,\*</sup>, Unai Pérez-Sautu<sup>2</sup>, Karla Prieto<sup>2,3</sup>, Sebastian  
4 Kehl<sup>1</sup>, Rocio M. Coelho<sup>1</sup>, Natalia Periolo<sup>1</sup>, Nicholas Di Paola<sup>2</sup>, Natalia Ferressini-Gerpe<sup>4</sup>,  
5 Jens H. Kuhn<sup>5</sup>, Mariano Sanchez-Lockhart<sup>2</sup>; Gustavo Palacios<sup>4,6,\*</sup>, Valeria P. Martínez<sup>1,\*,#</sup>

6 <sup>1</sup>Laboratorio Nacional de Referencia de Hantavirus, Instituto Nacional de Enfermedades  
7 Infecciosas, Administración Nacional de Laboratorios e Institutos de Salud "Dr. Carlos G.  
8 Malbran", Ciudad Autónoma de Buenos Aires, Argentina

9 <sup>2</sup>Center for Genome Sciences, United States Army Medical Research Institute of Infectious  
10 Diseases, Fort Detrick, Frederick, Maryland, USA

11 <sup>3</sup>College of Public Health, University of Nebraska Medical Center, Omaha, Nebraska, USA

12 <sup>4</sup>Department of Microbiology, Icahn School of Medicine at Mount Sinai, New York, New  
13 York, USA

14 <sup>5</sup>Integrated Research Facility at Fort Detrick, Division of Clinical Research, National Institute  
15 of Allergy and Infectious Diseases, National Institutes of Health, Fort Detrick, Frederick,  
16 Maryland, USA

17 <sup>6</sup>Global Health Emerging Pathogen Institute, Icahn School of Medicine at Mount Sinai, New  
18 York, New York, USA

19

20 Running Title: Pathogenic determinants in the Andes virus genome

21

22 \*These authors contributed equally to the study.

23 #Address correspondence to Gustavo Palacios, [Gustavo.palacios@mssm.edu](mailto:Gustavo.palacios@mssm.edu) or Valeria P.

24 Martínez, [valepm@gmail.com](mailto:valepm@gmail.com).

25 Word counts: Abstract, **180**; text, **3,227**

## 26 **STRUCTURED ABSTRACT**

### 27 **Abstract**

28 We performed whole-genome sequencing with bait-enrichment techniques to analyze Andes  
29 virus (ANDV), a cause of human hantavirus pulmonary syndrome. We used cryopreserved  
30 lung tissues from a naturally infected long-tailed colilargo; early, intermediate, and late cell-  
31 culture passages of an ANDV isolate from that animal; and lung tissues from golden hamsters  
32 experimentally exposed to that ANDV isolate. The resulting complete genome sequences  
33 were subjected to detailed comparative genomic analysis against American  
34 orthohantaviruses. We identified four amino-acid substitutions related to cell-culture  
35 adaptation that resulted in attenuation of ANDV in the typically lethal golden hamster animal  
36 model of hantavirus pulmonary syndrome. Mutations in the ANDV nucleocapsid protein,  
37 glycoprotein, and small nonstructural protein open reading frames correlated with mutations  
38 typical for ANDV strains associated with increased pathogenesis in the small animal model.  
39 Finally, we identified three amino-acid substitutions, two in the small nonstructural protein  
40 and one in the glycoprotein, that were only present in the clade of viruses associated with  
41 person-to-person efficient transmission. Our results indicate that there are virulence-  
42 associated and transmission-associated single-nucleotide polymorphisms that could be used  
43 to predict strain-specific ANDV virulence and/or transmissibility.

### 44 **Importance**

45 Several orthohantaviruses cause the zoonotic disease hantavirus pulmonary syndrome (HPS)  
46 in the Americas. Among them, HPS caused by Andes virus (ANDV) is of great public-health  
47 concern because it is associated with the highest case-fatality rate (up to 50%). ANDV is also  
48 the only orthohantavirus associated with relatively robust evidence of person-to-person  
49 transmission. This work reveals nucleotide changes in the ANDV genome that are associated  
50 with virulence attenuation in an animal model and increased transmissibility in humans.

51 These findings may pave the way to early severity predictions in future ANDV-caused HPS  
52 outbreaks.

## 53 INTRODUCTION

54 Approximately 25 rodent-borne orthohantaviruses (*Bunyavirales: Hantaviridae:*  
55 *Orthohantavirus*) have been identified as etiologic agents of human hantavirus pulmonary  
56 syndrome (HPS) in the Americas (1). In Argentina, most HPS cases are caused by Andes  
57 virus (ANDV) and somewhat uncharacterized ANDV-like viruses (e.g., Buenos Aires virus  
58 [BASV], Lechiguanas virus [LECV], Orán virus [ORNV]). HPS has a case-fatality range of  
59 21–50%, with ANDV typically causing the highest lethality (2-5). American  
60 orthohantaviruses are pathogenic for humans and subclinically infect cricetid rodents in  
61 nature; ANDV is primarily maintained by long-tailed colilargos (*Oligoryzomys longicaudatus*  
62 (Bennett, 1832)) (6).

63 The route of orthohantavirus transmission to humans is typically zoonotic, i.e., *ex vivo*  
64 without intermediate vectors (7). However, in 1996, an HPS outbreak caused by ANDV  
65 strain Epilink/96 that began in El Bolsón, Río Negro Province, Argentina, was attributed for  
66 the first time to person-to-person transmission (4, 8, 9). Sporadic HPS outbreaks with very  
67 limited person-to-person ANDV transmission have occurred over the last 25 years (2, 3, 10).  
68 Recently, state-of-the-art molecular epidemiology applied to a 2018–2019 HPS outbreak in  
69 Epuýén, Chubut Province, Argentina, confirmed the unique capacity of some strains of  
70 ANDV (in this instance, ANDV/Epuýén/18-19) to sustain forward orthohantavirus  
71 transmission in humans (11).

72 ANDV and Maporal virus (MAPV) are the only orthohantaviruses that have been  
73 documented to reproduce key features of HPS and cause lethal disease in a rodent model, i.e.,  
74 golden hamsters (*Mesocricetus auratus* (Waterhouse, 1839)) (12-14). Immunocompetent  
75 golden hamsters provide uniformly lethal results when exposed to the Chilean strain  
76 ANDV/CHI-9717869 (isolated from a long-tailed colilargo collected from Lago Atravesado,  
77 Coyhaique, Aysen Region, Chile, in 1997) (12, 15) or the Argentinean strain ANDV/ARG

78 (isolated from a long-tailed colilargo collected in the vicinity of the primordial site of  
79 discovery of ANDV [El Bolsón] in 2000) ([14](#)). However, the golden hamster model did not  
80 produce lethal results when exposed to a closely related strain, ANDV/CHI-7913 (isolated  
81 from clinical samples from a fatal case that was a family contact of the index case of an  
82 outbreak near Santiago, Chile, in 1999) ([16](#)). These findings indicated that subtle strain-  
83 specific genomic differences may have dramatic phenotypic consequences ([17](#)).

84 Cell-culture passaging has been associated with viral virulence attenuation for  
85 multiple orthohantaviruses in animal models ([18](#), [19](#)). We therefore hypothesized that serial  
86 cell-culture passaging of an ANDV known to be uniformly lethal in golden hamsters would  
87 result in attenuation, that attenuation would be traceable to specific mutations in the ANDV  
88 genome, and that these mutations may be catalysts for ANDV adaptation and therefore  
89 possible predictive markers for virulence and/or transmissibility.

## 90 RESULTS

### 91 Cell-culture passaging of Andes virus strain ARG results in virulence attenuation *in* 92 *vivo*.

93 Andes virus strain ARG (ANDV/ARG) is one of a select few available strains isolated  
94 directly from the rodent reservoir, long-tailed colilargos. To our knowledge, it is also the only  
95 ANDV strain directly sequenced from rodent material (passage 0 [p0]). We hypothesized that  
96 cell-culture passaging attenuates ANDV/ARG. To test this hypothesis, we passaged  
97 ANDV/ARG p9, described previously as causing 100% lethality in golden hamsters at 10 d  
98 after exposure (14), an additional 10 times in grivet Vero E6 cells (to p19). In a side-by-side  
99 comparison, all golden hamsters exposed via intramuscular injection of ANDV/ARG p9  
100 uniformly reached euthanasia criteria, as expected, whereas 33.3% of those exposed to  
101 ANDV/ARG p19 recovered, and mock-exposed control animals uniformly survived (**Fig. 1**).  
102 Kaplan–Meier comparison of survival curves and log-rank tests (Mantel–Cox [*p*-value  
103 <0.0001, Chi-square 18.47], trend variation with the number of passages [*p*-value 0.0101,  
104 Chi-square 6.610], and Gehan–Breslow–Wilcoxon [*p*-value 0.0005, Chi-square 15.13])  
105 demonstrated that these survival differences are statistically significant. ANDV/ARG RNA  
106 was consistently detected in golden hamster lung samples ( $3.8 \times 10^6$  to  $1.7 \times 10^{10}$  RNA copies  
107 per 100 mg of perfused tissue) in the ANDV/ARG p9 and p19 cohorts but not in the mock-  
108 exposed control cohort.

### 109 Phylogenetic analysis informs the evolutionary history of Buenos Aires virus and Andes 110 virus strain ARG.

111 We performed phylogenetic analysis of ANDV/ARG and Buenos Aires virus (BASV) small  
112 (S) and medium (M) genomic segments as well as the ANDV/ARG large (L) segment.  
113 Complete coding nucleic-acid sequences determined in this study were assessed together with  
114 previously determined sequences of ANDV, ANDV-like viruses Lechiguanas virus (LECV)

115 and Orán virus (ORNV), BASV/BA02-C1S, and several New World orthohantaviruses  
116 (Laguna Negra virus [LANV], Sin Nombre virus [SNV], Maporal virus [MAPV], Rio  
117 Mamoré virus [RIOMV], and Choclo virus [CHOV]). Four distinct ANDV clades are  
118 apparent in the most divergent S segment tree (**Fig. 2C; details about the strains are listed**  
119 **in Table S1**):

- 120 1. ANDV/CHI-7913 (Chile; long-tailed colilargo) and ANDV/NRC-4/18 (Argentina;  
121 human)
- 122 2. ANDV/Epilink/96, ANDV/Epuyén/18-19, ANDV/NRC-2/97, and ANDV/NRC-6/18  
123 (Argentina; human; all associated with person-to-person transmission);
- 124 3. ANDV/ARG (Argentina; long-tailed colilargo); and
- 125 4. ANDV/CHI-9717869 (Chile; long-tailed colilargo).

126 ANDV/ARG is therefore not directly related to the other ANDV strains associated with  
127 person-to-person transmission. Interestingly, BASV clusters separately from ANDV *sensu*  
128 *stricto* together with LECV and ORNV; and ANDV/CHI-9717869 appears to be the ancestral  
129 to the ANDV species. Further, the analysis also shows that ANDV/ARG genetic distances to  
130 other strains reflect their geographic distribution (**Fig. 2D**).

### 131 **Sequencing of passaged variants of Andes virus strain ARG reveals sites of adaptation** 132 **associated with attenuation in the golden hamster model.**

133 To identify genotypic differences associated with golden hamster model outcome phenotype,  
134 we sequenced the S, M, and L genomic segments of ANDV/ARG p0 (sampled from the long-  
135 tailed colilargo). The resulting isolate was seeded in Vero E6 cells for analysis of p3, p9 (14),  
136 and p19, as well as lung-tissue homogenate from golden hamsters exposed to ANDV/ARG  
137 p9. We also included a human blood sample of Buenos Aires virus (BASV/BA02-C1S) from  
138 a hantavirus pulmonary syndrome (HPS) case in La Plata, Provincia de Buenos Aires, in  
139 2002. We obtained complete genomic sequences for all segments (>98.3% coverage) for all



140 ANDV strains, except for the L segment from the p0 strain (46.1% coverage). Sequences are  
141 available in GenBank, under accession numbers OP555720–OPG555735.

142 The comparative analysis revealed only a few nucleotide changes over passages  
143 (**Table 1**), and p0 and p3 sequences were identical. By p9, three single-nucleotide  
144 polymorphisms (SNPs) were observed: two in the *S* segment (S46N in the nucleocapsid [*N*]  
145 open reading frame [ORF] and V20I in the small nonstructural protein [*NSs*] ORF) and one in  
146 the L segment (I1295M in the large protein [*L*] ORF). By p19, three additional SNPs were  
147 observed: one in the *S* segment (A21T), one in the *M* segment (S97P), and one in the L  
148 segment (P1675S); also, one reversion was observed in the *S* segment (affecting S46 in the *N*  
149 ORF and V20 in the *NSs* ORF). As expected, the p19 sequence had the highest number of  
150 non-synonymous substitutions. The changes were predominantly transitions (87.5%). After  
151 correction by segment length, it is evident that most nucleotide substitutions accumulated in  
152 the *S* segment. Surprisingly, very few SNPs were observed in the *M* segment. Interestingly,  
153 no reversions were detected in the genomic sequences of ANDV/ARG p9 in the lungs of  
154 golden hamsters exposed to ANDV/ARG p9. (*Note*: No data was collected from the lungs of  
155 golden hamsters exposed to ANDV/ARG p19.)

156 **Sequencing of Andes virus strain ARG reveals virulence markers when compared with**  
157 **pathogenic and non-pathogenic strains of Andes virus utilized in the golden hamster**  
158 **model.**

159 To identify potential genotypic virulence markers in the ANDV/ARG genome, we initially  
160 focused on 23 specific SNPs that had been described between the golden hamster attenuated  
161 ANDV/CHI-7913 compared to golden hamster lethal ANDV/CHI-9717869 ([17](#)). We also  
162 mapped 5 additional SNPs between those genomes, as the *NSs* ORF was not included in the  
163 original comparison ([17](#)). In 23 of those 28 positions, ANDV/ARG p0 shared nucleotide  
164 bases with attenuated ANDV/CHI-7913. ANDV/CHI-97177869 and ANDV/ARG only

165 shared position 11 of the *Gn* glycoprotein, position 938 of the *Gc* glycoprotein, and positions  
166 20 and 37 of the *NSs* ORFs (**Table 2**). ANDV/ARG differ from both ANDV/CHI-7913 and  
167 ANDV/CHI-9717869 in genome position 46 of the *N* ORF.

168 Next, we focused on comparing the amino-acid changes that arose during  
169 ANDV/ARG passaging with the differences in virulence observed in the golden hamster  
170 model. We identified five: A21T in the *N* ORF, V20I in the *NSs* ORF, S97P in the *Gn*  
171 glycoprotein, and I1295M and P1675S in the *L* ORF.

172 T21, which only appeared in ANDV/ARG p19, occurs in a region known to  
173 participate in orthohantavirus *NSs* homotypic interactions ([20](#)). Additionally, we identified a  
174 second amino-acid change in the *N* ORF (S46N), which was only encoded by ANDV/ARG  
175 p9 (**Table 1 and Table 2**). Interestingly, in the same *N* ORF, Simons et al. reported an  
176 ANDV-specific kinase-recruitable hypervariable domain (HVD) in the *N* ORF by comparison  
177 of ANDV/CHI-7913 with other American orthohantaviruses and demonstrated its importance  
178 in regulating interferon (IFN) signaling ([21](#)). The HVD, which consists of 44 residues  
179 (nucleotides 252 to 296), encodes 6 characteristic amino acids (at positions A253, K262,  
180 N273, H286, T289, and T296) that are determinants of the phosphorylation of S386 in the *N*  
181 ORF, which is posited as a virulence determinant ([21](#)). Although we confirmed that S386 and  
182 five of the six residues are conserved among all ANDV and ANDV-like viruses (**Table 2 and**  
183 **3**) A253 is exclusive for ANDV and has been mutated to P (BASV and LECV) or L (ORNV)  
184 in ANDV-like viruses.

185 The recently discovered ANDV *NSs* antagonizes the type I IFN response by  
186 inhibiting mitochondrial antiviral-signaling protein (MAVS) signaling by binding MAV  
187 without disrupting MAVS-TBK-1 ([20](#)). In the presence of ANDV *NSs*, the ubiquitinylation  
188 of MAVS is reduced. The V20I SNPs in the *NSs* ORF was observed arising in the  
189 ANDV/ARG p9 strain by the same mutation in nucleotide position 179 in the S segment.

190 (*Note:* The *NSs* ORF is in position +1 compared with the *N* ORF.) ANDV/CHI-9717869 and  
191 ANDV/CHI-7913 differ in the *NSs* ORF in five amino-acid positions (5, 20, 33, 35, and 37;  
192 **Table 2 and 3**).

193 The S97P Gn mutation, found only in ANDV/ARG p19, could not be associated with  
194 any functional change. The site has only been reported as part of an antibody epitope ([22](#)).  
195 The S residue is conserved in BASV and LANV Gns, whereas other orthohantavirus Gns  
196 (LECV, ORNV, MAPV, RIOMV, SNV, and CHOV) have an A in that position (**Table 2 and**  
197 **Table 3**).

198 M1295 and S1675 in the *L* ORF were encoded by ANDV/ARG p9 and p19 strains,  
199 respectively, but those genomic regions could not be associated with any functionality.  
200 M1295 has not been observed previously in nature; other orthohantavirus have I1295  
201 (MAPV, RIOMV, LANV, and CHOV) or Y1295 (SNV) (**Table 2**). S1675 has not been  
202 observed in *L* ORFs of other orthohantaviruses, and P1675 position appears entirely  
203 conserved (**Table 2**).

204 **Sequencing of Andes virus strain ARG reveals potential transmissibility markers when**  
205 **comparing Andes virus strains with differences of efficiency in person-to-person**  
206 **potential.**

207 The presence of outbreak-related determinants associated with person-to-person transmission  
208 was assessed by comparing genomic sequences of ANDV strains from clades clearly  
209 associated with person-to-person transmission and ANDV strains and ANDV-like viruses  
210 (BASV, LECV, and ORNV) that had not (**Table 3**). Interestingly, BASV, the most closely  
211 related ANDV-like virus (**Fig. 2A-C**), has also been implicated in secondary transmissions  
212 but with limited efficiency ([23](#), [24](#)).

213 Only one mutation in the *M* segment (T641I) was unique to person-to-person-  
214 associated clade 2 strains. Only one mutation in the *S* segment (A253N) was exclusively

215 present in ANDV, whereas S386N is conserved among ANDV strains and ANDV-like  
216 viruses. Our analysis did not include the *L* segment of ANDV-like viruses because those  
217 sequences remain unavailable.

218 Five *M* ORF positions were unique to ANDV genomes compared with genomes of  
219 ANDV-like viruses (amino-acid positions 97, 569, 570, 641, and 1133; **Table 3**). Three (569,  
220 570, and 1133) are shared by all ANDV strains. S97 is encoded by all ANDV strains and  
221 BASV, whereas the T641I change was only encoded by ANDV strains from the clade  
222 associated with person-to-person transmission. However, only the latter (T641I) had been  
223 mapped in the vicinity of the absolutely conserved pentapeptide WAASA cleavage site,  
224 where signal peptidases cleave Gn and Gc (25). Since position 641 maps to a region that  
225 provides a signal to cellular peptidases, this mutation might affect the cleavage's efficiency.  
226 Signal peptides share several characteristic features determined by their amino-acid  
227 composition (26), including a tripartite architecture with a positively charged N-terminus and  
228 a hydrophobic segment that determines the strength of the signal. T641 changes from a polar  
229 non-charged amino acid (T) to a non-polar (I) amino acid.

230 In comparison with the bulk of described ANDV isolates, the recently discovered  
231 ANDV *NSs* ORF presents seven sites of variation. Three are unique to ANDV/CHI-9717869  
232 (Q5, E33, and L35) and two are unique to ANDV/CHI-7913 (I20 and D37). Intriguingly, we  
233 identified two SNPs in the *NSs* ORF at positions 40 (Q40R) and 47 (N47S) that were present  
234 only in the clade 2 strains (e.g., ANDV/Epuyén/18–19 and ANDV/Epilink/96) associated  
235 with person-to-person transmission. Both *NSs* ORF changes need to be functionally evaluated  
236 for their effect on MAVS signaling.

237 **DISCUSSION**

238 Passaging in cell culture, especially when involving different hosts, usually results in virus  
239 adaptation, often affecting their virulence ([19](#), [27](#), [28](#)). However, ANDV/ARG p0 and p3  
240 genome sequences were identical, and very few mutations were accumulated in the p9, p19,  
241 and hamster strains. The two amino-acid substitutions (A21T and S46N) in the *N* ORF  
242 mapped to the intramolecular coiled coil structure in the N-terminal region ( $\alpha 1$  and  $\alpha 2$ ), an  
243 exceptionally well-conserved region implicated in antibody recognition, formation of the  
244 ribonucleoprotein complex, and genome encapsidation ([29-32](#)). Interestingly, one adaptation  
245 appears to involve a change in the novel *NSs* ORF, which has been recently related with IFN  
246 regulation. Only a single nucleotide change (T337C) was found in the *M* segment during late  
247 passaging (p19). This is unexpected since the *M* segment encodes for *Gn* and *Gc*, two of the  
248 most variable regions of the genome in evolutionary terms.

249         Interestingly, we could also correlate some of the changes with differences in  
250 pathogenicity in a small animal model. ANDV/ARG p9 is uniformly lethal in hamsters ([14](#)).  
251 However, ANDV/ARG p19 was significantly less lethal (66.4%). Compared side-by-side, the  
252 ANDV/ARG p9 and p19 only diverged in three encoded residues (A21T in *N*, S97P in *Gn*,  
253 and P1675S in RNA-dependent RNA polymerase (RdRp) codified in the *S*, *M*, and *L*  
254 segments, respectively). Nevertheless, based on previous knowledge of functional domains,  
255 only the change in the *N* had been associated with viral replication. Structural studies of the  
256 N-terminal region of SNV and ANDV demonstrated that basic residues interact with the *N*  
257 core to stabilize interprotomer *N* association and formation of ribonucleoprotein (RNP)  
258 complexes ([31](#)). The A21T change likely affects that region, which is exceptionally well-  
259 conserved among orthohantaviruses. The region is a target of the most cross-reactive  
260 antibodies against orthohantavirus, immunodominant, and proposed to have important effects  
261 regarding *N* polymerization, RNP complex formation, and subcellular localization of the

262 assembly sites ([29-31](#)). We hypothesize that A21T and other changes in N (**Table 2 and**  
263 **Table 3**) may affect N oligomerization dynamics. The importance of this area as a potential  
264 determinant of pathogenesis might be underscored by the observed differences in the region  
265 at positions 31 (A31T) and 38 (D38E) (**Table 3**) that define ANDV-like viruses (i.e., BASV,  
266 LECV, and ORNV). The changes, all located at the bend between the two parallel coiled  
267 regions, could potentially affect the structure of the region. On the other hand, these two  
268 changes are only encoded by ANDV-like viruses, but not by LANV, MAPV, RIOMV, or  
269 SNV (**Table 2**). Thus, if these markers are associated with pathogenesis, they would act via  
270 changes in the structure and not necessarily by SNP differences. Although the T21A mutation  
271 observed in late passages of ANDV/ARG is intriguing, A21 is conserved in BASV, LECV,  
272 and ORNV, but not SNV (**Table 2**). Collectively, this could indicate that structural changes  
273 in this area could be driving virulence differences, instead of SNPs. Moreover, our analysis  
274 confirmed that the amino-acid position S386, previously posited by Simons as a determinant  
275 of virulence ([21](#)), is conserved by ANDV, ANDV-like viruses (BASV, LECV, and ORNV),  
276 and LANV. In the N HVD, all ANDV strains share the described signature six residues,  
277 which are not found in any other orthohantavirus N HVD (**Table 2**). However, only five  
278 residues are shared with the three ANDV-like viruses, while A253 seems to be an exclusive  
279 ANDV marker (**Table 3**). We therefore suggest that A253 is an ANDV-exclusive virulence  
280 determinant and that the S386 modification and the five remaining HDV residues are  
281 pathogenic determinants for all viruses currently classified in species *Andes orthohantavirus*  
282 (i.e., ANDV and ANDV-like viruses). The N ORF has been associated with multiple  
283 functions associated with pathogenesis and virulence. The efficiency of orthohantavirus  
284 replication is inversely proportional to the ability of infected cells to activate MxA expression  
285 ([33](#)). The MxA protein is a critical component of the antiviral state induced by type I IFN  
286 ([34](#)). In turn, MxA protein binds to N, forming an MxA–N protein complex in a yet-to-be-

287 defined manner (35). Moreover, the N protein also has a role in regulating the antiviral state.  
288 For instance, ANDV N hinders autophosphorylation of TBK1, resulting in the inhibition of  
289 IRF3 phosphorylation and RIG-I/MDA5-directed type I IFN induction (36). Additionally, N  
290 can affect protein kinase R (PKR) dimerization (37), thereby preventing PKR  
291 phosphorylation, which is essential for its enzymatic activity. PKR inhibits virus replication  
292 (38).

293         Bunyaviral NSs are nonessential for virus replication, but they are pathogenesis  
294 determinants by acting as IFN antagonists (39). As a case in point, ANDV/CHI-9717869 NSs  
295 antagonize the type I IFN induction pathway (20). We therefore hypothesize that the two  
296 changes observed in NSs of ANDV strains associated with person-to-person transmission  
297 might enhance IFN antagonist potential. Moreover, the number of changes in ANDV/CHI-  
298 9717869 compared with ANDV/CHI-7913 and ANDV/ARG might explain the differences in  
299 lethality in the golden hamster animal model.

300         In the M segment, the amino-acid change T641I is also shared among ANDV strains  
301 associated with person-to-person-transmission but not among ANDV-like viruses. However,  
302 the change is also found in ANDV/NRC-6/18, which has not been associated with person-to-  
303 person transmission and it is absent in ANDV/NRC-3/18, which has been involved in an  
304 event of secondary transmission (Table 3). T641 is located in the signal peptide of Gc, in the  
305 region preceding the hyperconserved cleavage site WAASA. Because host protease landing  
306 sites are guided by the signal from this region (20), we hypothesize that this mutation might  
307 affect the dynamics and speed of ANDV glycoprotein retention and trafficking. Signal  
308 peptides share several characteristic features determined by their amino-acid composition  
309 (40), including a tripartite architecture with a positively charged N-terminus and a  
310 hydrophobic segment that determines the strength of the signal.

311           The phylogenetic analysis showed that ANDV/ARG is closely related to variants  
312 causing disease in humans and groups according to their geographic origin. ANDV/CHI-7913  
313 is most closely related to ANDV/ARG, more than sequences obtained from patients reported  
314 in the endemic region. ANDV/CHI-9717869, on the other hand, is the most genetically  
315 divergent and remote geographically. Indeed, ANDV/ARG and ANDV/CHI-7913 share the  
316 most positions compared to ANDV/CHI-9717869. Thus, the decision to use ANDV/CHI-  
317 9717869 as the accepted challenge stock for medical countermeasure assessment needs to be  
318 revised, as this strain is a clear outlier that might not be representative of wild-type  
319 circulating strains.

320           Taken together, the results of our study indicate that determination and subsequent  
321 comparison of wild-type, cell-culture-passaged, and animal model-derived ANDV—and  
322 likely other orthohantavirus genome sequences—may allow predictions regarding their  
323 overall virulence and transmissibility, possibly informing countermeasure approaches. To  
324 strengthen such predictions, additional sequence information from yet-to-be-characterized  
325 ANDV strains and completion of genomic sequences of ANDV-like viruses is warranted.



## 326 MATERIALS AND METHODS

### 327 Viruses and cells.

328 Andes virus strain ARG (ANDV/ARG) was isolated from a long-tailed colilargo  
329 (*Oligoryzomys longicaudatus* (Bennett, 1832)) in grivet (*Chlorocebus aethiops* (Linnaeus,  
330 1758)) kidney epithelial Vero E6 cells (CRL-1586; ATCC, Manassas, VA, USA) ([41](#)).  
331 Continuous ANDV infection of cells was monitored by immunofluorescence performed with  
332 a rabbit polyclonal serum generated against ANDV nucleocapsid protein (N) open reading  
333 frame (ORF) and real-time reverse transcription PCR (RT-qPCR), and cultures were  
334 passaged blindly. Serial passaging (p9–p19) was performed at a multiplicity of infection of  
335 0.1.

### 336 Pathogenicity assessment.

337 An established lethal animal model of ANDV infection, using golden hamsters (*Mesocricetus*  
338 *auratus* (Waterhouse, 1839)) ([12](#)), was leveraged to compare the previously established  
339 pathogenicity of the ANDV strain ARG (ANDV/ARG p9) ([17](#)) and to assess the  
340 pathogenicity of ANDV/ARG p19. Eight 12-week-old golden hamsters (four males and four  
341 females, obtained from the Instituto Nacional de Producción de Biológicos in Buenos Aires)  
342 were exposed intramuscularly to 100 µL of mock inoculum (phosphate-buffered saline  
343 [PBS]). Nine 12-week-old golden hamsters (four males and five females) were exposed  
344 intramuscularly to 100 µL of PBS containing 10<sup>5</sup> focus-forming units of ANDV/ARG p19.  
345 Exposed golden hamsters were placed individually in ventilated cages and monitored daily up  
346 to 33 d post-exposure. Food and water were available *ad libitum*. All animal experiments  
347 were performed in an accredited animal biological safety level 3 (ABSL-3) biocontainment  
348 laboratory in compliance with institutional guidelines and Argentinian national law no.  
349 14,346, which regulates experiments involving animals and adheres to principles stated in the  
350 Guide for the Care and Use of Laboratory Animals, National Research Council.

351 **RT-qPCR.**

352 Lung specimens were obtained from all golden hamsters following standard necropsy  
353 protocols. Total RNA was extracted from lung specimens using Trizol, as described  
354 previously ([42](#)). Quantitative RT-qPCR using ANDV genomic small (S) segment primers  
355 was performed following published procedures ([43](#)). Two microliters of each RNA sample  
356 were amplified in duplicate assays with a CFX detection system (Bio-Rad, Hercules, CA,  
357 USA) using TaqMan RT-PCR master mix (Quanta Biosciences, Gaithersburg, MD, USA),  
358 according to the manufacturers' instructions. A primer set designed to detect the human  
359 RNaseP gene was used to ensure that samples were free of PCR inhibitors and that RNA  
360 extractions were homogeneous.

361 **Genomic and phylogenetic analyses.**

362 Virus genome sequencing was performed using three ANDV cell-culture passages (early  
363 [p3], intermediate [p9], and late [p19]; cryopreserved lung tissue from a naturally ANDV-  
364 infected long-tailed colilargo (p0); and lung tissues obtained from a golden hamsters exposed  
365 to ANDV/ARG p9. Also included in the analysis was a blood clot sample from a hantavirus  
366 pulmonary syndrome (HPS) patient (case C1-s, survivor, 14 yr) associated with secondary  
367 transmission of Buenos Aires virus (BASV) in Central Argentina ([24](#)).

368 Total RNA was extracted from cell-culture supernatants, lung tissues, and clinical  
369 samples utilizing Trizol. Virus genome sequencing was performed as previously described  
370 ([11](#), [44](#)). Briefly, a targeted bait-enrichment approach was used to enrich RNA-seq libraries  
371 for sequencing on the MiSeq platform (Illumina, San Diego, CA, USA). Hantavirus  
372 sequences from each genomic segment (S, M, and L) were collected (Table S1) and aligned  
373 using MAFFT v.7.397, implemented in Clustal W version 2.0 ([45](#)). The initial dataset  
374 consisted of coding-complete sequences obtained in this work and listed in Table S1. Other  
375 American orthohantavirus sequences from GenBank were also included. The resulting

- 376 alignments were visually inspected to identify synonymous and nonsynonymous changes.
- 377 Phylogenetic trees were reconstructed using IQ-TREE v. 1.6.12 ([46](#)) with automatic model
- 378 selection ([47](#)). Branch supports were assessed by 1,000 ultrafast bootstraps ([46](#)).
- 379 **Data availability.**
- 380 Sequencing data are publicly available through GenBank under accession numbers
- 381 OP555720 to OPG555735.

382 **ACKNOWLEDGMENTS**

383 We gratefully acknowledge Silvia A. Girard for her excellent technical assistance, M.  
384 Amoroso for veterinary medical care, and Alexis Edelstein for access to the animal biological  
385 safety level 3 facilities. The authors also thank Anya Crane (Integrated Research Facility at  
386 Fort Detrick, National Institute of Allergy and Infectious Diseases, National Institutes of  
387 Health, Fort Detrick, Frederick, MD, USA) for critically editing the manuscript and Jiro  
388 Wada (Integrated Research Facility at Fort Detrick, National Institute of Allergy and  
389 Infectious Diseases, National Institutes of Health, Fort Detrick, Frederick, MD, USA) for  
390 preparing figures.

391 This work was supported in part through Laulima Government Solutions, LLC, prime  
392 contract with the National Institutes of Health (NIH) National Institute of Allergy and  
393 Infectious Diseases (NIAID) under Contract No. HHSN272201800013C. J.H.K. performed  
394 this work as an employee of Tunnell Government Services (TGS), a subcontractor of Laulima  
395 Government Solutions, LLC, under Contract No. HHSN272201800013C. The views and  
396 conclusions contained in this document are those of the authors and should not be interpreted  
397 as necessarily representing the official policies, either expressed or implied, of the U.S.  
398 Department of Health and Human Services, the U.S. Army, or of the institutions and  
399 companies affiliated with the authors, nor does mention of trade names, commercial products,  
400 or organizations imply endorsement by the U.S. Government.

401 We declare no conflict of interest.

402 **REFERENCES**

- 403 1. Kuhn JH, Charrel RN. 2018. Arthropod-borne and rodent-borne virus infections, p  
404 1489-1509. *In* Jameson JL, Fauci AS, Kasper DL, Hauser SL, Longo DL, Loscalzo J  
405 (ed), *Harrison's Principles of Internal Medicine*, 20<sup>th</sup> ed, vol 2. McGraw-Hill  
406 Education, Columbus, USA.
- 407 2. Alonso DO, Iglesias A, Coelho R, Periolo N, Bruno A, Córdoba MT, Filomarino N,  
408 Quipildor M, Biondo E, Fortunato E, Bellomo C, Martínez VP. 2019.  
409 Epidemiological description, case-fatality rate, and trends of hantavirus pulmonary  
410 syndrome: 9 years of surveillance in Argentina. *J Med Virol* 91:1173-1181.
- 411 3. Martinez VP, Bellomo CM, Cacace ML, Suárez P, Bogni L, Padula PJ. 2010.  
412 Hantavirus pulmonary syndrome in Argentina, 1995-2008. *Emerg Infect Dis* 16:1853-  
413 60.
- 414 4. Wells RM, Sosa Estani S, Yadon ZE, Enria D, Padula P, Pini N, Mills JN, Peters CJ,  
415 Segura EL, Hantavirus Pulmonary Syndrome Study Group for Patagonia. 1997. An  
416 unusual hantavirus outbreak in southern Argentina: person-to-person transmission?  
417 *Emerg Infect Dis* 3:171-4.
- 418 5. Tortosa F, Carrasco G, Gallardo D, Prandi D, Parodi V, Santamaría G, Ragusa M,  
419 Volij C, Izcovich A. 2022. Factores pronósticos de síndrome cardiopulmonar y  
420 muerte por hantavirus Andes Sur: estudio de cohorte en San Carlos de Bariloche y su  
421 zona de influencia sanitaria. *Medicina (B Aires)* 82:351-360.
- 422 6. Levis S, Morzunov SP, Rowe JE, Enria D, Pini N, Calderon G, Sabattini M, St Jeor  
423 SC. 1998. Genetic diversity and epidemiology of hantaviruses in Argentina. *J Infect*  
424 *Dis* 177:529-38.
- 425 7. Jonsson CB, Schmaljohn CS. 2001. Replication of hantaviruses. *Curr Top Microbiol*  
426 *Immunol* 256:15-32.

- 427 8. Padula PJ, Edelstein A, Miguel SDL, López NM, Rossi CM, Rabinovich RD. 1998.  
428 Brote epidémico del síndrome pulmonar por hantavirus en la Argentina. Evidencia  
429 molecular de la transmisión persona a persona del virus Andes. *Medicina (B Aires)* 58  
430 Suppl 1:27-36.
- 431 9. Enria D, Padula P, Segura EL, Pini N, Edelstein A, Posse CR, Weissenbacher MC.  
432 1996. Hantavirus pulmonary syndrome in Argentina. Possibility of person to person  
433 transmission. *Medicina (B Aires)* 56:709-11.
- 434 10. Riquelme R, Rioseco ML, Bastidas L, Trincado D, Riquelme M, Loyola H,  
435 Valdivieso F. 2015. Hantavirus pulmonary syndrome, Southern Chile, 1995-2012.  
436 *Emerg Infect Dis* 21:562-8.
- 437 11. Martínez VP, Di Paola N, Alonso DO, Pérez-Sautu U, Bellomo CM, Iglesias AA,  
438 Coelho RM, López B, Periolo N, Larson PA, Nagle ER, Chitty JA, Pratt CB, Díaz J,  
439 Cisterna D, Campos J, Sharma H, Digheero-Kemp B, Biondo E, Lewis L, Anselmo C,  
440 Olivera CP, Pontoriero F, Lavarra E, Kuhn JH, Strella T, Edelstein A, Burgos MI,  
441 Kaler M, Rubinstein A, Kugelman JR, Sanchez-Lockhart M, Perandonces C, Palacios  
442 G. 2020. "Super-spreaders" and person-to-person transmission of Andes virus in  
443 Argentina. *N Engl J Med* 383:2230-2241.
- 444 12. Hooper JW, Larsen T, Custer DM, Schmaljohn CS. 2001. A lethal disease model for  
445 hantavirus pulmonary syndrome. *Virology* 289:6-14.
- 446 13. Milazzo ML, Eyzaguirre EJ, Molina CP, Fulhorst CF. 2002. Maporal viral infection  
447 in the Syrian golden hamster: a model of hantavirus pulmonary syndrome. *J Infect Dis*  
448 186:1390-5.
- 449 14. Martinez VP, Padula PJ. 2012. Induction of protective immunity in a Syrian hamster  
450 model against a cytopathogenic strain of Andes virus. *J Med Virol* 84:87-95.

- 451 15. Toro J, Vega JD, Khan AS, Mills JN, Padula P, Terry W, Yadón Z, Valderrama R,  
452 Ellis BA, Pavletic C, Cerda R, Zaki S, Shieh W-J, Meyer R, Tapia M, Mansilla C,  
453 Baro M, Vergara JA, Concha M, Calderon G, Enria D, Peters CJ, Ksiazek TG. 1998.  
454 An outbreak of hantavirus pulmonary syndrome, Chile, 1997. *Emerg Infect Dis*  
455 4:687-94.
- 456 16. Galeno H, Mora J, Villagra E, Fernandez J, Hernandez J, Mertz GJ, Ramirez E. 2002.  
457 First human isolate of hantavirus (*Andes virus*) in the Americas. *Emerg Infect Dis*  
458 8:657-61.
- 459 17. Warner BM, Sloan A, Deschambault Y, Dowhanik S, Tierney K, Audet J, Liu G,  
460 Stein DR, Lung O, Buchanan C, Sroga P, Griffin BD, Siragam V, Frost KL, Booth S,  
461 Banadyga L, Saturday G, Scott D, Kobasa D, Safronetz D. 2021. Differential  
462 pathogenesis between Andes virus strains CHI-7913 and Chile-9717869 in Syrian  
463 Hamsters. *J Virol* 95:e00108-21.
- 464 18. Safronetz D, Prescott J, Feldmann F, Haddock E, Rosenke R, Okumura A, Brining D,  
465 Dahlstrom E, Porcella SF, Ebihara H, Scott DP, Hjelle B, Feldmann H. 2014.  
466 Pathophysiology of hantavirus pulmonary syndrome in rhesus macaques. *Proc Natl*  
467 *Acad Sci U S A* 111:7114-9.
- 468 19. Nemirov K, Lundkvist Å, Vaheiri A, Plyusnin A. 2003. Adaptation of Puumala  
469 hantavirus to cell culture is associated with point mutations in the coding region of the  
470 L segment and in the noncoding regions of the S segment. *J Virol* 77:8793-800.
- 471 20. Vera-Otarola J, Solis L, Lowy F, Olguín V, Angulo J, Pino K, Tischler ND, Otth C,  
472 Padula P, López-Lastra M. 2020. The Andes orthohantavirus NSs protein antagonizes  
473 the type I interferon response by inhibiting MAVS signaling. *J Virol* 94:e00454-20.

- 474 21. Simons MJ, Gorbunova EE, Mackow ER. 2019. Unique interferon pathway regulation  
475 by the Andes virus nucleocapsid protein Is conferred by phosphorylation of serine  
476 386. *J Virol* 93:e00338-19.
- 477 22. Duehr J, McMahon M, Williamson B, Amanat F, Durbin A, Hawman DW, Noack D,  
478 Uhl S, Tan GS, Feldmann H, Krammer F. 2020. Neutralizing monoclonal antibodies  
479 against the Gn and the Gc of the Andes virus glycoprotein spike complex protect from  
480 virus challenge in a preclinical hamster model. *mBio* 11:e00028-20.
- 481 23. Iglesias AA, Bellomo CM, Martínez VP. 2016. Síndrome pulmonar por hantavirus en  
482 Buenos Aires, 2009-2014. *Medicina (B Aires)* 76:1-9.
- 483 24. Martinez VP, Bellomo C, San Juan J, Pinna D, Forlenza R, Elder M, Padula PJ. 2005.  
484 Person-to-person transmission of Andes virus. *Emerg Infect Dis* 11:1848-53.
- 485 25. Löber C, Anheier B, Lindow S, Klenk H-D, Feldmann H. 2001. The Hantaan virus  
486 glycoprotein precursor is cleaved at the conserved pentapeptide WAASA. *Virology*  
487 289:224-9.
- 488 26. von Heijne G. 1990. The signal peptide. *J Membr Biol* 115:195-201.
- 489 27. Koehler A, Kolesnikova L, Becker S. 2016. An active site mutation increases the  
490 polymerase activity of the guinea pig-lethal Marburg virus. *J Gen Virol* 97:2494-  
491 2500.
- 492 28. Trefry JC, Wollen SE, Nasar F, Shamblin JD, Kern SJ, Bearss JJ, Jefferson MA,  
493 Chance TB, Kugelman JR, Ladner JT, Honko AN, Kobs DJ, Wending MQS,  
494 Sabourin CL, Pratt WD, Palacios GF, Pitt MLM. 2015. Ebola virus infections in  
495 nonhuman primates are temporally influenced by glycoprotein poly-U editing site  
496 populations in the exposure material. *Viruses* 7:6739-54.
- 497 29. Boudko SP, Kuhn RJ, Rossmann MG. 2007. The coiled-coil domain structure of the  
498 Sin Nombre virus nucleocapsid protein. *J Mol Biol* 366:1538-44.



- 499 30. Wang Y, Boudreaux DM, Estrada DF, Egan CW, St Jeor SC, De Guzman RN. 2008.  
500 NMR structure of the N-terminal coiled coil domain of the Andes hantavirus  
501 nucleocapsid protein. *J Biol Chem* 283:28297-304.
- 502 31. Guo Y, Wang W, Sun Y, Ma C, Wang X, Wang X, Liu P, Shen S, Li B, Lin J, Deng  
503 F, Wang H, Lou Z. 2016. Crystal structure of the core region of hantavirus  
504 nucleocapsid protein reveals the mechanism for ribonucleoprotein complex formation.  
505 *J Virol* 90:1048-61.
- 506 32. Yoshimatsu K, Arikawa J. 2014. Antigenic properties of N protein of hantavirus.  
507 *Viruses* 6:3097-109.
- 508 33. Kanerva M, Melén K, Vaheri A, Julkunen I. 1996. Inhibition of Puumala and Tula  
509 hantaviruses in Vero cells by MxA protein. *Virology* 224:55-62.
- 510 34. Pavlovic J, Schröder A, Blank A, Pitossi F, Staeheli P. 1993. Mx proteins: GTPases  
511 involved in the interferon-induced antiviral state. *Ciba Found Symp* 176:233-43;  
512 discussion 243-7.
- 513 35. Khaiboullina SF, Rizvanov AA, Lombardi VC, Morzunov SP, Reis HJ, Palotás A, St  
514 Jeor S. 2013. Andes-virus-induced cytokine storm is partially suppressed by ribavirin.  
515 *Antivir Ther* 18:575-84.
- 516 36. Cimica V, Dalrymple NA, Roth E, Nasonov A, Mackow ER. 2014. An innate  
517 immunity-regulating virulence determinant is uniquely encoded by the Andes virus  
518 nucleocapsid protein. *mBio* 5:e01088-13.
- 519 37. Wang Z, Mir MA. 2015. Andes virus nucleocapsid protein interrupts protein kinase R  
520 dimerization to counteract host interference in viral protein synthesis. *J Virol*  
521 89:1628-39.
- 522 38. Goodbourn S, Didcock L, Randall RE. 2000. Interferons: cell signalling, immune  
523 modulation, antiviral response and virus countermeasures. *J Gen Virol* 81:2341-2364.

- 524 39. Ly HJ, Ikegami T. 2016. Rift Valley fever virus NSs protein functions and the  
525 similarity to other bunyavirus NSs proteins. *Virology* 13:118.
- 526 40. von Heijne G. 1999. Recent advances in the understanding of membrane protein  
527 assembly and structure. *Q Rev Biophys* 32:285-307.
- 528 41. Padula PJ, Sanchez AJ, Edelstein A, Nichol ST. 2002. Complete nucleotide sequence  
529 of the M RNA segment of Andes virus and analysis of the variability of the termini of  
530 the virus S, M and L RNA segments. *J Gen Virol* 83:2117-2122.
- 531 42. Padula P, Figueroa R, Navarrete M, Pizarro E, Cadiz R, Bellomo C, Jofre C, Zaror L,  
532 Rodriguez E, Murúa R. 2004. Transmission study of Andes hantavirus infection in  
533 wild sigmodontine rodents. *J Virol* 78:11972-9.
- 534 43. Bellomo CM, Pires-Marczeski FC, Padula PJ. 2015. Viral load of patients with  
535 hantavirus pulmonary syndrome in Argentina. *J Med Virol* 87:1823-30.
- 536 44. Alonso DO, Pérez-Sautu U, Bellomo CM, Prieto K, Iglesias A, Coelho R, Periolo N,  
537 Domenech I, Talmon G, Hansen R, Palacios G, Martinez VP. 2020. Person-to-person  
538 transmission of Andes virus in hantavirus pulmonary syndrome, Argentina, 2014.  
539 *Emerg Infect Dis* 26:756-759.
- 540 45. Katoh K, Standley DM. 2013. MAFFT multiple sequence alignment software version  
541 7: improvements in performance and usability. *Mol Biol Evol* 30:772-80.
- 542 46. Minh BQ, Schmidt HA, Chernomor O, Schrempf D, Woodhams MD, von Haeseler A,  
543 Lanfear R. 2020. IQ-TREE 2: new models and efficient methods for phylogenetic  
544 inference in the genomic era. *Mol Biol Evol* 37:1530-1534.
- 545 47. Kalyaanamoorthy S, Minh BQ, Wong TKF, von Haeseler A, Jermini LS. 2017.  
546 ModelFinder: fast model selection for accurate phylogenetic estimates. *Nat Methods*  
547 14:587-589.
- 548

549 **FIGURE LEGENDS**

550 **Fig 1 Cell-culture passaging of Andes virus results in virulence attenuation *in vivo*.**

551 Shown are Kaplan–Meier survival curves of golden hamsters inoculated intramuscularly with  
552 three different preparations until the study endpoint. ANDV/ARG, Andes virus strain ARG;  
553 p, passage.

554 **Fig 2 Phylogenetic analysis informs the evolutionary history of Buenos Aires virus  
555 (BASV) and Andes virus strain ARG (ANDV/ARG).**

556 (A) Small (S) segment analysis; large (L) segment and medium (M) segment analysis are  
557 included in **Figure S1**. All variants are listed with the strain name, region of origin, year of  
558 the isolation and accession number. Different colors are used for identification (brown for  
559 non-ANDV South American orthohantaviruses; green for ANDV-like viruses; light blue for  
560 ANDV strains in clades 1, 2, 4, and some in 3; and dark blue for passaged strains in clade 3).  
561 Detailed information of epidemiological history of the strains is listed in **Table S1**. (B)  
562 Geographic distribution of American orthohantaviruses strains analyzed in A. Mulchén and  
563 Coyhaique are in Chile, the other locations are in Argentina. The inset shows the endemic  
564 area of ANDV in Argentina and Chile.

565

566 **Supplementary Figure 1. Phylogenetic analysis of the M and L segments informs the**  
567 **evolutionary history of Buenos Aires virus (BASV) and Andes virus strain ARG**  
568 **(ANDV/ARG).**

569 All variants are listed with the strain name, region of origin, year of the isolation and  
570 accession number. Different colors are used for identification (brown for non-ANDV South  
571 American orthohantaviruses; green for ANDV-like viruses; light blue for ANDV strains; and  
572 dark blue for passaged strains in clade 3). Detailed information of epidemiological history of  
573 the strains is listed in **Table S1**.

## 574 TABLES

575 Table 1 Sequencing of passaged variants of ANDV/ARG reveals sites of adaptation associated with attenuation in the golden hamster  
576 model.

|                                            |                     |                     | ANDV /ARG passages |              |              |              |                                     | 577               |
|--------------------------------------------|---------------------|---------------------|--------------------|--------------|--------------|--------------|-------------------------------------|-------------------|
| Source                                     |                     |                     | ARG (p0)           | ARG-p3       | ARG-p9       | ARG-p19      | ARG-Hamster-p9                      |                   |
|                                            |                     |                     | Rodent tissue      | Cell culture | Cell culture | Cell culture | Lung infected syrian golden hamster |                   |
| Genomic Region                             | Nucleotide position | Amino-acid position | GenBank N°         |              |              |              |                                     |                   |
| S Segment                                  |                     | Genbank             | OP555723           | OP555720     | OP555721     | OP555722     | OP555728                            | Type              |
| <b>N ORF</b>                               |                     |                     |                    |              |              |              |                                     |                   |
|                                            | 57                  |                     | CAG (Q)            | CAG (Q)      | CAG (Q)      | CAA (Q)      | CAG (Q)                             | Syn               |
|                                            | 103                 | 21                  | GCT (A)            | GCT (A)      | GCT (A)      | ACT (T)      | GCT (A)                             | Non-syn           |
|                                            | 179                 | 46                  | AGT (S)            | AGT (S)      | AAT (N)      | AGT (S)      | AAT (N)                             | Non-syn           |
|                                            | 1488                | Not coding          | G                  | G            | G            | T            | G                                   |                   |
| <b>NSs ORF (+1)</b>                        |                     |                     |                    |              |              |              |                                     |                   |
|                                            | 179                 | 20                  | GTA (V)            | GTA (V)      | ATA (I)      | GTA (V)      | ATA (I)                             | Non-syn           |
| <b>M Segment</b>                           |                     | Genbank             | OP555724           | OP555725     | OP555726     | OP555727     | OP555729                            |                   |
|                                            | 337                 | 97                  | TCC (S)            | TCC (S)      | TCC (S)      | CCC (P)      | TCC (S)                             | Non-syn           |
| <b>L Segment</b>                           |                     | Genbank             | NA                 | OP555732     | OP555733     | OP555734     | OP555735                            | Functional region |
|                                            | 3557                | 1175                | NA                 | ACC (T)      | ACT (T)      | ACT (T)      | ACT (T)                             | Syn               |
|                                            | 3919                | 1295                | NA                 | ATA (I)      | ATG (M)      | ATG (M)      | ATG (M)                             | Non-syn           |
|                                            | 5057                | 1675                | NA                 | CCT (P)      | CCT (P)      | TCT (S)      | CCT (P)                             | Non-syn           |
| red color, changes observed during passage |                     |                     |                    |              |              |              |                                     |                   |

578 **Table 2 Sequencing of ANDV/ARG reveals virulence markers when compared with pathogenic and non-pathogenic strains of ANDV**  
 579 **utilized in the golden hamster model**

|                              |                     | ANDV                     |              |              |              |                |                |                      |                   |          |                 | Other orthohantavirus |          |                                          |                      |                          |              |           |  |
|------------------------------|---------------------|--------------------------|--------------|--------------|--------------|----------------|----------------|----------------------|-------------------|----------|-----------------|-----------------------|----------|------------------------------------------|----------------------|--------------------------|--------------|-----------|--|
| Strain/Virus                 | CHI-9717869         | ARG p0                   | ARG p3       | ARG p9       | ARG p19      | CHI-7913       | Epuyen/18-19   | Eplink/96            | MAPV              | RIOMV    | LANV            | SNV                   | CHOV     |                                          |                      |                          |              |           |  |
| Geographic origin            | Coyhaique, Chile    | SMA, Neuquén             | SMA, Neuquén | SMA, Neuquén | SMA, Neuquén | Mulchén Biobío | Epuyen, Chubut | El Bolsón, Río Negro | Western Venezuela | Peru     | Chaco, Paraguay | United States         | Panama   |                                          |                      |                          |              |           |  |
| Lethality in golden hamsters | High                | High                     | High         | High         | Moderate     | No             | NA             | NA                   | Moderate          | No       | NA              | No                    | No       |                                          |                      |                          |              |           |  |
| Genomic Region               | Amino-acid position | GenBank accession number |              |              |              |                |                |                      |                   |          |                 |                       |          | Functional region                        | Note                 | Reference                |              |           |  |
| S Segment                    | GenBank             | MT956622                 | OP555723     | OP555720     | OP555721     | OP555722       | MT956618       | MN258239             | MN258223          | FJ008979 | FJ532244        | NC_038502             | KT885046 | KT983771                                 |                      |                          |              |           |  |
| NS ORF                       | 21                  | A                        | A            | A            | A            | T              | A              | A                    | A                 | A        | A               | T                     | A        | Homotypic interaction coiled-coil region | ANDV attenuation     | Taylor et al / this work |              |           |  |
|                              | 31                  | A                        | A            | A            | A            | A              | A              | A                    | A                 | A        | A               | A                     | A        |                                          |                      | This work                |              |           |  |
|                              | 38                  | D                        | D            | D            | D            | D              | D              | D                    | D                 | D        | D               | D                     | D        | coiled-coil region                       |                      | This work                |              |           |  |
|                              | 46                  | N                        | S            | S            | N            | S              | N              | S                    | N                 | N        | S               | S                     | G        | coiled-coil bend                         | No                   | Taylor et al / this work |              |           |  |
|                              | 253                 | A                        | A            | A            | A            | A              | A              | A                    | Q                 | Q        | Q               | P                     | P        | HPV                                      | ANDV exclusive       | Simons et al             |              |           |  |
|                              | 262                 | K                        | K            | K            | K            | K              | K              | K                    | R                 | R        | R               | R                     | R        | HPV                                      | ANDV exclusive       | Simons et al             |              |           |  |
|                              | 273                 | N                        | N            | N            | N            | N              | N              | N                    | R                 | D        | D               | D                     | R        | HPV                                      | ANDV exclusive       | Simons et al             |              |           |  |
|                              | 286                 | H                        | H            | H            | H            | H              | H              | H                    | T                 | A        | A               | D                     | T        | HPV                                      | ANDV exclusive       | Simons et al             |              |           |  |
|                              | 289                 | T                        | T            | T            | T            | T              | T              | T                    | A                 | S        | A               | A                     | S        | HPV                                      | ANDV exclusive       | Simons et al             |              |           |  |
|                              | 296                 | T                        | T            | T            | T            | T              | T              | T                    | H                 | N        | N               | A                     | K        | HPV                                      | ANDV exclusive       | Simons et al             |              |           |  |
|                              | 396                 | S                        | S            | S            | S            | S              | S              | S                    | H                 | F        | S               | H                     | H        | Serin-Kinase substrate                   | ANDV exclusive       | Simons et al             |              |           |  |
|                              | NSs ORF (+1)        | 5                        | Q            | R            | R            | R              | R              | R                    | R                 | Q        | Q               | Q                     | R        | Q                                        | Unknown              |                          | This work    |           |  |
|                              |                     | 20                       | V            | V            | V            | V              | V              | V                    | V                 | T        | T               | A                     | A        | G                                        | Unknown              |                          | This work    |           |  |
|                              |                     | 33                       | E            | G            | G            | G              | G              | G                    | G                 | G        | Q               | Q                     | E        | E                                        | Unknown              |                          | This work    |           |  |
|                              |                     | 35                       | L            | S            | S            | S              | S              | S                    | S                 | S        | S               | S                     | L        | S                                        | Unknown              |                          | This work    |           |  |
| 37                           |                     | G                        | G            | G            | G            | G              | G              | G                    | G                 | D        | G               | G                     | G        | Unknown                                  | ANDV attenuation     | This work                |              |           |  |
| 40                           |                     | Q                        | Q            | Q            | Q            | Q              | Q              | R                    | R                 | Q        | Q               | Q                     | L        | Q                                        | Unknown              | PTP outbreak related     | This work    |           |  |
| 47                           |                     | N                        | N            | N            | N            | N              | N              | S                    | S                 | N        | S               | N                     | N        | N                                        | Unknown              | PTP outbreak related     | This work    |           |  |
| M Segment                    |                     | GenBank                  | MT956622     | OP555724     | OP555725     | OP555726       | OP555727       | MT956619             | MN258205          | MN258194 | AY363179        | FJ608550              | NC038506 | L25783                                   | KT983772             | Functional region        | Note         | Reference |  |
|                              |                     | 8                        | V            | A            | A            | A              | A              | A                    | A                 | I        | I               | I                     | F        | F                                        | Signal sequence Gn   | No                       | Warner et al |           |  |
|                              |                     | 11                       | V            | V            | V            | V              | V              | V                    | V                 | V        | V               | V                     | V        | V                                        | Signal sequence Gn   | ANDV attenuation         | Warner et al |           |  |
|                              |                     | 97                       | S            | S            | S            | S              | P              | S                    | S                 | A        | A               | S                     | A        | V                                        | Antibody epitope?    | ANDV attenuation         | This work    |           |  |
|                              |                     | 294                      | H            | Y            | Y            | Y              | Y              | Y                    | Y                 | Y        | S               | V                     | L        | I                                        | II                   | No                       | Warner et al |           |  |
|                              |                     | 346                      | V            | I            | I            | I              | I              | I                    | I                 | I        | I               | I                     | I        | L                                        | conserved Cys        | No                       | Warner et al |           |  |
|                              |                     | 353                      | T            | V            | V            | V              | V              | V                    | V                 | I        | K               | H                     | V        | Q                                        | conserved Cys and    | No                       | Warner et al |           |  |
|                              |                     | 499                      | V            | V            | V            | V              | V              | V                    | V                 | I        | L               | L                     | L        | L                                        | glycosylation sites  | PTP outbreak related     | This work    |           |  |
|                              | 537                 | I                        | V            | V            | V            | V              | V              | V                    | V                 | V        | V               | V                     | I        | RNP-BS                                   | No                   | Warner et al             |              |           |  |
|                              | 569                 | I                        | I            | I            | I            | I              | I              | I                    | P                 | A        | V               | P                     | C        | Z'                                       | ANDV exclusive       | This work                |              |           |  |
|                              | 570                 | N                        | N            | N            | N            | N              | N              | N                    | E                 | E        | E               | E                     | D        | Z'                                       | ANDV exclusive       | This work                |              |           |  |
|                              | 641                 | T                        | T            | T            | T            | T              | T              | T                    | T                 | T        | T               | T                     | T        | notI                                     | PTP outbreak related | This work                |              |           |  |
|                              | 938                 | T                        | T            | T            | T            | T              | A              | A                    | A                 | T        | T               | S                     | A        | Glycosylation site                       | No                   | Warner et al             |              |           |  |
|                              | 1023                | T                        | A            | A            | A            | A              | A              | A                    | A                 | T        | A               | T                     | V        | transmembrane domain Gc                  | No                   | Warner et al             |              |           |  |
|                              | 1115                | V                        | V            | V            | V            | V              | V              | I                    | I                 | V        | V               | V                     | I        | V                                        | ?                    | PTP outbreak related     | This work    |           |  |
| 1133                         | G                   | G                        | G            | G            | G            | G              | G              | G                    | S                 | S        | S               | V                     | BS       | ANDV exclusive                           | This work            |                          |              |           |  |
| L Segment                    | GenBank             | MT956621                 | NA           | OP555732     | OP555733     | OP555734       | MT956620       | MN258188             | MN258186          | EU788002 | FJ809772        | JX443696              | L37901   | EF397003                                 | Functional region    | Note                     | Reference    |           |  |
|                              | 141                 | T                        | NA           | I            | I            | I              | I              | V                    | V                 | I        | I               | Q                     | Q        | Endonuclease domain                      | No                   | Warner et al             |              |           |  |
|                              | 181                 | I                        | NA           | V            | V            | V              | V              | V                    | V                 | V        | V               | V                     | V        | Unknown                                  |                      | Warner et al             |              |           |  |
|                              | 277                 | L                        | NA           | S            | S            | S              | S              | S                    | S                 | E        | E               | V                     | L        | Unknown                                  | No                   | Warner et al             |              |           |  |
|                              | 338                 | S                        | NA           | A            | A            | A              | A              | A                    | A                 | A        | A               | A                     | A        | Unknown                                  | No                   | Warner et al             |              |           |  |
|                              | 346                 | R                        | NA           | K            | K            | K              | K              | K                    | K                 | R        | E               | K                     | R        | Unknown                                  | No                   | Warner et al             |              |           |  |
|                              | 402                 | I                        | NA           | V            | V            | V              | V              | I                    | I                 | T        | M               | I                     | P        | I                                        | Unknown              | No                       | Warner et al |           |  |
|                              | 780                 | D                        | NA           | N            | N            | N              | N              | N                    | N                 | E        | K               | V                     | Q        | Q                                        | Unknown              | No                       | Warner et al |           |  |
|                              | 1033                | N                        | NA           | D            | D            | D              | D              | D                    | D                 | D        | D               | E                     | N        | Unknown                                  | No                   | Warner et al             |              |           |  |
|                              | 1252                | T                        | NA           | T            | T            | T              | T              | T                    | T                 | T        | T               | T                     | V        | T                                        | Unknown              |                          | Warner et al |           |  |
|                              | 1265                | I                        | NA           | I            | I            | I              | I              | I                    | I                 | I        | I               | I                     | Y        | I                                        | Unknown              | No                       | This work    |           |  |
|                              | 1303                | D                        | NA           | E            | E            | E              | E              | E                    | E                 | D        | D               | D                     | D        | Unknown                                  | No                   | Warner et al             |              |           |  |
|                              | 1665                | V                        | NA           | I            | I            | I              | I              | V                    | V                 | I        | I               | V                     | V        | Unknown                                  | No                   | Warner et al             |              |           |  |
|                              | 1675                | P                        | NA           | P            | P            | S              | P              | P                    | P                 | P        | P               | P                     | P        | P                                        | Unknown              | ANDV attenuation         | This work    |           |  |
|                              | 1750                | K                        | NA           | R            | R            | R              | R              | R                    | R                 | K        | K               | R                     | K        | R                                        | Unknown              | No                       | Warner et al |           |  |
| 1828                         | T                   | NA                       | P            | P            | P            | P              | P              | P                    | P                 | P        | A               | P                     | Unknown  | No                                       | Warner et al         |                          |              |           |  |
| 2109                         | I                   | NA                       | V            | V            | V            | V              | V              | V                    | R                 | R        | R               | N                     | T        | Unknown                                  | No                   | Warner et al             |              |           |  |
| 2113                         | T                   | NA                       | A            | A            | A            | A              | T              | T                    | K                 | T        | T               | R                     | A        | Unknown                                  | No                   | Warner et al             |              |           |  |

HPV: Kinase recruitment site  
 NA: Not available  
 green color: SNPs that differentiate ANDV/CHI-7913 and ANDV/CHI-917869 where ANDV/ARG segregate with ANDV/CHI-7913  
 red color: SNPs that differentiate ANDV/CHI-7913 and ANDV/CHI-917869 where ANDV/ARG segregate with ANDV/CHI-917869  
 blue color: SNPs selected during passaging  
 orange color: SNPs that characterize PTP isolates  
 purple color: SNPs that are unique to ANDV/ARG (not present in ANDV/CHI-7913 nor in ANDV/CHI-917869)

580 Table 3 Sequencing of ANDV/ARG reveals potential transmissibility markers when comparing ANDV strains with differences of  
 581 efficiency in person-to-person potential

| VIRUS                         | ANDV                   |              |                 |                      |                      |                 |                          |                      |                          |                  | BASV           | BASV            | LECV      | ORNV        |
|-------------------------------|------------------------|--------------|-----------------|----------------------|----------------------|-----------------|--------------------------|----------------------|--------------------------|------------------|----------------|-----------------|-----------|-------------|
| Strain                        | CH-9717869             | Andes/ARG    | ARG-Epuyen      | ARG-Epilink          | AREB14               | NRC-6/18        | NRC-3/18                 | NRC-2/97             | NRC-4/97                 | CH-7913          | BA02-C1S       | Hu39694         | 22819     | AND Nort    |
| Country                       | Chile                  | Argentina    | Argentina       | Argentina            | Argentina            | Argentina       | Argentina                | Argentina            | Argentina                | Chile            | Argentina      | Argentina       | Argentina | Argentina   |
| Geographic origin             | Coyhaique              | SMA, Neuquén | Epuyen, Chubut  | El Bolson, Río Negro | El Bolson, Río Negro | El Hoyo, Chubut | Villa Meliquina, Neuquén | Bariloche, Río Negro | Villa Meliquina, Neuquén | Mulchen, Bio Bio | La Plata, BsAs | Pergamino, BsAs | BsAs      | Oran, Salta |
| Source                        | Rodent                 | Rodent       | Human           | Human                | Human                | Human           | Human                    | Human                | Human                    | Human            | Human          | Human           | Rodent    | Rodent      |
| Clade                         | 4                      | 3            | 2               | 2                    | 2                    | 2               | 1                        | 1                    | 1                        | 1                | ANDV-like      | ANDV-like       | ANDV-like | ANDV-like   |
| Person-to-Person transmission | No                     | -            | Outbreak (n=34) | Outbreak (n=16)      | Outbreak (n=3)       | No              | Event                    | No                   | No                       | No               | Event          | No              | No        | No          |
| Genomic Region                |                        |              |                 |                      |                      |                 |                          |                      |                          |                  |                |                 |           |             |
| S Segment                     | GenBank N <sup>o</sup> |              |                 |                      |                      |                 |                          |                      |                          |                  |                |                 |           |             |
| N (amino-acid position)       | MT956622               | OP555720     | MN258239        | MN258223             | MN850084             | MN258228        | MN258225                 | MN258224             | MN258226                 | MT956618         | OP555730       | AF482711        | AF482714  | AF325966    |
| 31                            | A                      | A            | A               | A                    | A                    | A               | A                        | A                    | A                        | A <sup>a</sup>   | T              | T               | T         | T           |
| 38                            | D                      | D            | D               | D                    | D                    | D               | D                        | D                    | D                        | D <sup>a</sup>   | E              | E               | E         | E           |
| 253                           | A                      | A            | A               | A                    | A                    | A               | A                        | A                    | A                        | A                | P              | P               | P         | L           |
| 262                           | K                      | K            | K               | K                    | K                    | K               | K                        | K                    | K                        | K                | K              | K               | K         | K           |
| 273                           | N                      | N            | N               | N                    | N                    | N               | N                        | N                    | N                        | N                | N              | N               | N         | N           |
| 286                           | H                      | H            | H               | H                    | H                    | H               | H                        | H                    | H                        | H                | H              | H               | H         | H           |
| 289                           | T                      | T            | T               | T                    | T                    | T               | T                        | T                    | T                        | T <sup>a</sup>   | T              | T               | T         | I           |
| 296                           | T                      | T            | T               | T                    | T                    | T               | T                        | T                    | T                        | T                | T              | T               | T         | T           |
| 386*                          | S                      | S            | S               | S                    | S                    | S               | S                        | S                    | S                        | S                | T              | T               | T         | T           |
| NSs (amino-acid position)     |                        |              |                 |                      |                      |                 |                          |                      |                          |                  |                |                 |           |             |
| 5                             | Q                      | R            | R               | R                    | R                    | R               | R                        | R                    | R                        | R                | R              | R               | R         | R           |
| 20                            | V                      | V            | V               | V                    | V                    | V               | V                        | V                    | V                        | I                | V              | V               | V         | V           |
| 33                            | E                      | G            | G               | G                    | G                    | G               | G                        | G                    | G                        | G                | E              | E               | G         | E           |
| 35                            | L                      | S            | S               | S                    | S                    | S               | S                        | S                    | S                        | S                | S              | S               | S         | L           |
| 37                            | G                      | G            | G               | G                    | G                    | G               | G                        | G                    | G                        | D                | G              | G               | D         | G           |
| 40                            | Q                      | Q            | R               | R                    | R                    | R               | Q                        | Q                    | Q                        | Q                | P              | P               | Q         | R           |
| 47                            | N                      | N            | S               | S                    | S                    | S               | N                        | N                    | N                        | N                | N              | N               | N         | N           |
| M Segment:                    | GenBank N <sup>o</sup> |              |                 |                      |                      |                 |                          |                      |                          |                  |                |                 |           |             |
| M (amino-acid position)       | MT956623               | OP555725     | MN258205        | MN258189             | MN850089             | MN258194        | MN258191                 | MN258190             | MN258192                 | MT956619         | OP555731       | AF028023        | AF028022  | AF028024    |
| 97*                           | S                      | S            | S               | S                    | S                    | S               | S                        | S                    | S                        | S                | S              | S               | A         | A           |
| 569                           | I                      | I            | I               | I                    | I                    | I               | I                        | I                    | I                        | I                | I              | I               | I         | I           |
| 570                           | N                      | N            | N               | N                    | N                    | N               | N                        | N                    | N                        | N                | N              | N               | N         | N           |
| 641                           | T                      | T            | I               | I                    | I                    | I               | T                        | T                    | T                        | T                | T              | T               | T         | T           |
| 1133                          | G                      | G            | G               | G                    | G                    | G               | G                        | G                    | G                        | G                | G              | G               | G         | G           |

\*also present in LANV

<sup>a</sup>SNPs (likely sequencing errors) in AF325966  
 green color, SNPs that differentiate ANDV/CHI-7913 abd ANDV/CHI-917869 where ANDV/ARG segregate with ANDV/CHI-7913  
 red color, SNPs that differentiate ANDV/CHI-7913 abd ANDV/CHI-917869 where ANDV/ARG segregate with ANDV/CHI-917869  
 orange color, SNPs that characterize PTP isolates  
 blue color, SNPs that differentiate ANDV-like from ANDV viruses

582 Table S1 List of sequences and strains utilized in the comparative genomics study of American orthohantaviruses

| Orthohantavirus    | Source (human, rodent species)                               | Strain name    | Clade (based on 5 segment) | Site/Source             | Administrative region | Country   | Year | Genbank accession number |          |          | Reference                                   | PMID               | Denomination in manuscript           |
|--------------------|--------------------------------------------------------------|----------------|----------------------------|-------------------------|-----------------------|-----------|------|--------------------------|----------|----------|---------------------------------------------|--------------------|--------------------------------------|
|                    |                                                              |                |                            |                         |                       |           |      | S                        | M        | L        |                                             |                    |                                      |
| Andes virus        | Human                                                        | NRC-4/18       | 1                          | Villa Meliquina         | Neuquén               | Argentina | 2018 | MN258226                 | MN258192 | MN258159 | Martinez VP <i>et al.</i>                   | 33264545           | ANDV/NRC-4/18                        |
| Andes virus        | long-tailed collilargo ( <i>Oligoryzomys longicaudatus</i> ) | ARG            | 3                          | San Martín de los Andes | Neuquén               | Argentina | 1999 | OP555728                 | OP555724 | NA       | <b>This work</b>                            |                    | ANDV/ARG                             |
| Andes virus        | Cell culture passage 3; Vero E6                              | ARG/p3         | 3                          | San Martín de los Andes | Neuquén               | Argentina | 1999 | OP555720                 | OP555725 | OP555732 | <b>This work</b>                            |                    | ANDV/ARG p3                          |
| Andes virus        | Cell culture passage 9; Vero E6                              | ARG/p9         | 3                          | San Martín de los Andes | Neuquén               | Argentina | 1999 | OP555721                 | OP555726 | OP555733 | <b>This work</b>                            |                    | ANDV/ARG p9                          |
| Andes virus        | Cell culture passage 19; Vero E6                             | ARG/p19        | 3                          | San Martín de los Andes | Neuquén               | Argentina | 1999 | OP555722                 | OP555727 | OP555734 | <b>This work</b>                            |                    | ANDV/ARG p19                         |
| Andes virus        | ANDV/Arg p9-infected golden hamsters                         | Mau JARG/p19   | 3                          | San Martín de los Andes | Neuquén               | Argentina | 1999 | OP555723                 | OP555729 | OP555735 | <b>This work</b>                            |                    | ANDV/Mau JARG/p19                    |
| Andes virus        | Human                                                        | ARG-Epuyen     | 2                          | Epuyén                  | Chubut                | Argentina | 2018 | MN258239                 | MN258205 | MN258172 | Martinez VP <i>et al.</i>                   | 33264545           | ANDV/Epuyen/18-19                    |
| Andes virus        | Human                                                        | NRC-6/18       | 2                          | El Hoyo                 | Chubut                | Argentina | 2018 | MN258228                 | MN258194 | MN258161 | Martinez VP <i>et al.</i>                   | 33264545           | ANDV/NRC-6/18                        |
| Andes virus        | Human                                                        | ARG-Epillink   | 2                          | El Bolsón               | Río Negro             | Argentina | 1996 | MN258223                 | MN258189 | MN258156 | Martinez VP <i>et al.</i>                   | 33264545           | ANDV/Epilink/96                      |
| Andes virus        | Human                                                        | NRC-2/97       | 2                          | Bariloche               | Río Negro             | Argentina | 1997 | MN258224                 | MN258190 | MN258157 | Martinez VP <i>et al.</i>                   | 33264545           | ANDV/NRC-2/18                        |
| Andes virus        | Human                                                        | AREB14/P2      | 2                          | El Bolsón               | Río Negro             | Argentina | 2014 | MN850084                 | MN850089 | MN850094 | Martinez VP <i>et al.</i>                   | 33264545           | ANDV/AREB14-P2/Hum/RioNegro-ARG/2014 |
| Andes virus        | long-tailed collilargo ( <i>Oligoryzomys longicaudatus</i> ) | CHI-9717869    | 4                          | Coyhaique               | Aysén                 | Chile     | 1997 | AF291702                 | AF291703 | AF291704 | Meisner <i>et al.</i>                       | 12367756           | ANDV/CHI-9717869                     |
| Andes virus        | long-tailed collilargo ( <i>Oligoryzomys longicaudatus</i> ) | CHI-9717869    | 4                          | Coyhaique               | Aysén                 | Chile     | 1997 | MT956622                 | MT956623 | MT956621 | Warner <i>et al.</i>                        | 33627395           | ANDV/CHI-9717869                     |
| Andes virus        | Human                                                        | CHI-7913       | 1                          | Mulchén                 | Biobio                | Chile     | 1999 | MT956618                 | MT956619 | MT956620 | Warner <i>et al.</i>                        | 33627395           | ANDV/CHI-7913                        |
| Andes virus        | Human                                                        | CHI-7913       | 1                          | Mulchén                 | Biobio                | Chile     | 1999 | AY228237                 | AY228238 | AY228239 | Tischler <i>et al.</i>                      | 14513715           | ANDV/CHI-7913                        |
| Buenos Aires virus | Human                                                        | Hu39694        | ANDV-like                  | Pergamino               | Buenos Aires          | Argentina | 2002 | AF482711                 | NA       | NA       | Bohlman <i>et al.</i>                       | 11907216           | BASV/Hu39694                         |
| Buenos Aires virus | Human                                                        | Hu39694        | ANDV-like                  | Pergamino               | Buenos Aires          | Argentina | 2002 | NA                       | AF028023 | NA       | Levis <i>et al.</i>                         | 9498428            | BASV/Hu39694                         |
| Buenos Aires virus | Human                                                        | BA02-C15       | ANDV-like                  | La Plata                | Buenos Aires          | Argentina | 2002 | OP555730                 | OP555731 | NA       | <b>This work</b>                            |                    | BASV/BA02-C15                        |
| Orán virus         | long-tailed collilargo ( <i>Oligoryzomys longicaudatus</i> ) | OI22996        | ANDV-like                  | Orán                    | Salta                 | Argentina | 2002 | AF482715                 | AF028024 | NA       | Levis <i>et al.</i>                         | 9498428            | ORNV/OI22996                         |
| Orán virus         | Chacoan collilargo ( <i>Oligoryzomys chacoensis</i> )        | AND Nort       | ANDV-like                  | Orán                    | Salta                 | Argentina | 2002 | AF325966                 | NA       | NA       | Gonzalez Della Valle <i>et al.</i>          | 12224579           | ORNV/OI22996                         |
| Lechiguanas virus  | Fluorescent collilargo ( <i>Oligoryzomys flavescens</i> )    | 22819          | ANDV-like                  | Lechiguanas islands     | Entre Ríos            | Argentina | 2002 | AF482714                 | AF028022 | NA       | Bohlman <i>et al.</i> & Levis <i>et al.</i> | 11907216 / 9100632 | LECV/22819                           |
| Maporal virus      | Fulvous collilargo ( <i>Oligoryzomys fulvescens</i> )        | HV-97021050    | AH                         | Western Venezuela       | Western Venezuela     | Venezuela | 2004 | AY267347                 | AY363179 | EU788002 | Fulhorst <i>et al.</i>                      | 15246651           | MAPV/HV-97021050                     |
| Rio Mamoré virus   | Small-eared collilargo ( <i>Oligoryzomys microtis</i> )      | HTN-007        | AH                         | Iquitos                 | Maynas                | Peru      | 2010 | FJ532244                 | FJ608550 | FJ809772 | Richter <i>et al.</i>                       | 20687859           | RIOMV/HTN-007                        |
| Laguna Negra virus | Little laucha ( <i>Calomys laucha</i> )                      | 510B           | AH                         | Chaco                   | Chaco                 | Paraguay  | 1997 | AF005727                 | AF005728 | NA       | Johnson <i>et al.</i>                       | 9375015            | LANV/510B                            |
| Laguna Negra virus | Little laucha ( <i>Calomys laucha</i> )                      | H731172/BRA259 | AH                         | Nova Olimpia            | Paraná                | Brazil    | 2007 | NA                       | NA       | JX443696 | Firth <i>et al.</i>                         | 23055565           | LANV/H731172/BRA259                  |
| Sin Nombre virus   | Human                                                        | NM H10         | AH                         | Four Corners Area       | New Mexico            | USA       | 1994 | L25784                   | L25783   | L37901   | Spiropoulou <i>et al.</i>                   | 8178455/7494336    | SNV/NM H10                           |
| Choclo virus       | Fulvous collilargo ( <i>Oligoryzomys fulvescens</i> )        | 588            | AH                         | Panama                  | Panamá                | Panama    | 2015 | KT983771                 | KT983772 | EF397003 | Cajimat/Kho <i>et al.</i>                   | Unpublished        | CHOV/588                             |

on-ANDV American orthohantavirus  
 \* as reported, but there are no reports of long-tailed collilargos in northern Argentina



Figure 1

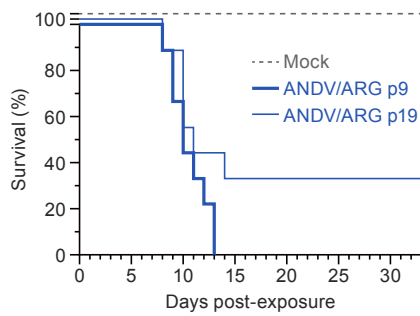

**Fig 1. Cell-culture passaging of Andes virus results in virulence attenuation *in vivo*.**

Shown are Kaplan–Meier survival curves of golden hamsters inoculated intramuscularly with three different preparations until the study endpoint. ANDV/ARG, Andes virus strain ARG; p, passage.

Figure 2

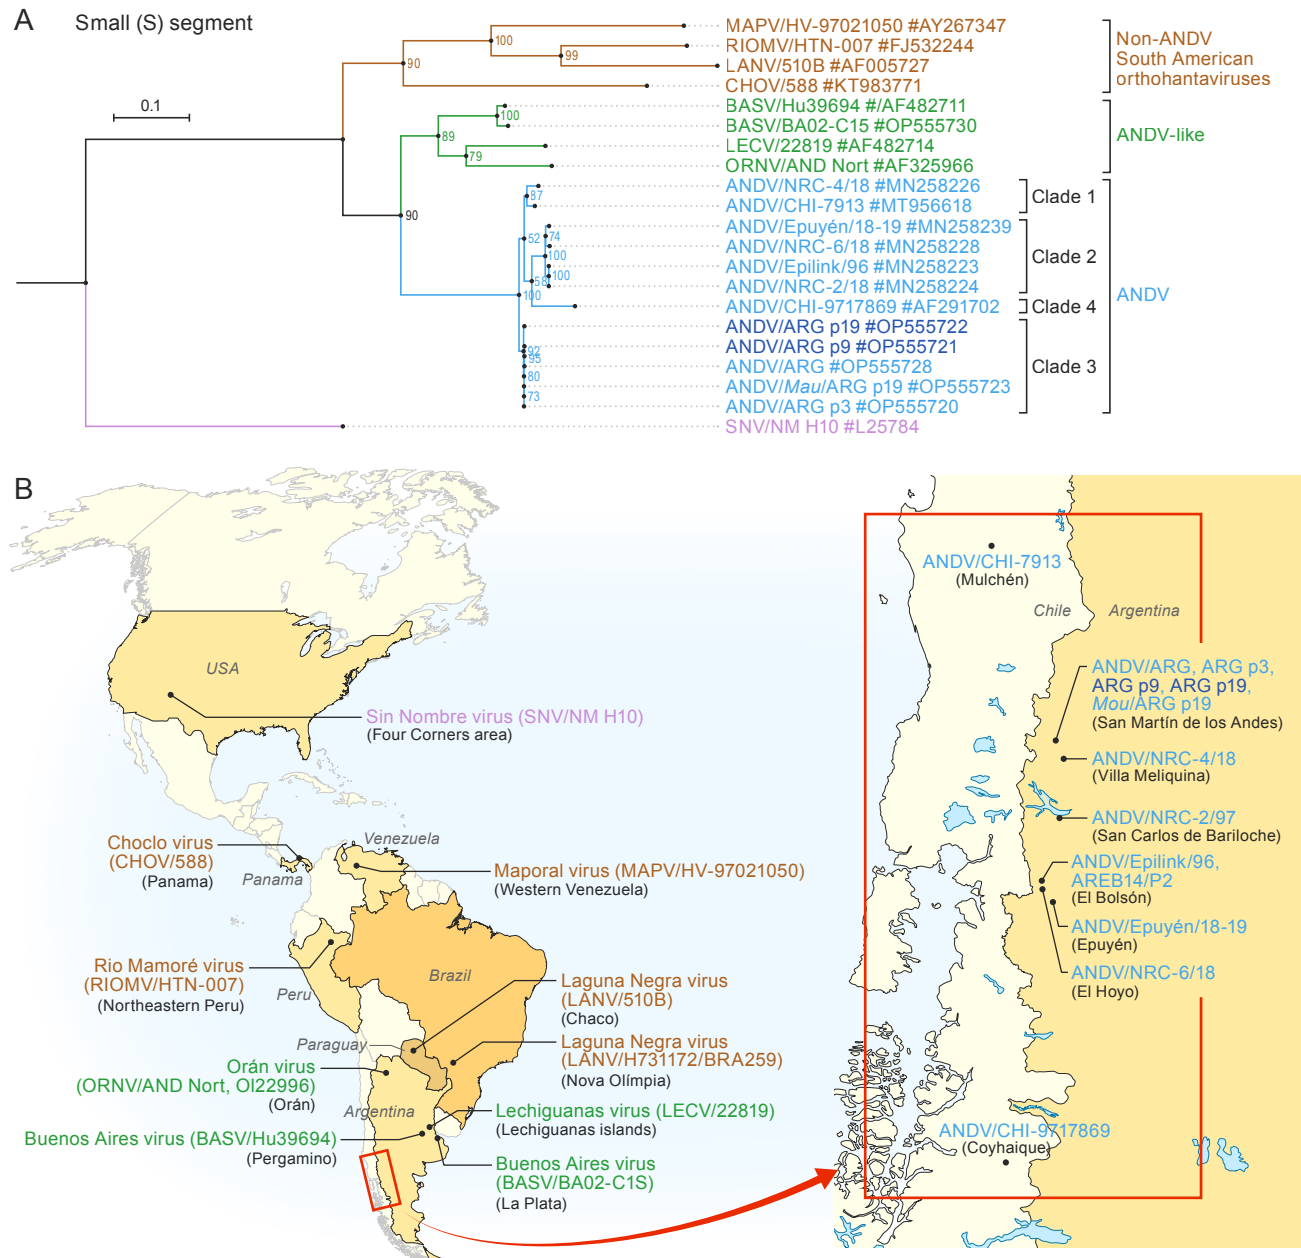

**Fig 2. Phylogenetic analysis informs the evolutionary history of Buenos Aires virus (BASV) and Andes virus strain ARG (ANDV/ARG).**

(A) Small (S) segment analysis; large (L) segment and medium (M) segment analysis are included in **Figure S1**. All variants are listed with the strain name, region of origin, year of the isolation and accession number. Different colors are used for identification (brown for non-ANDV South American orthohantaviruses; green for ANDV-like viruses; light blue for ANDV strains in clades 1, 2, 4, and some in 3; and dark blue for passaged strains in clade 3). Detailed information of epidemiological history of the strains is listed in **Table S1**. (B) Geographic distribution of American orthohantaviruses strains analyzed in A. Mulchén and Coyhaique are in Chile, the other locations are in Argentina. The inset shows the endemic area of ANDV in Argentina and Chile.
